# Supplementary material for: Structural and Biological Features of G-Quadruplex Aptamers as Promising Inhibitors of the STAT3 Signaling Pathway
Source: MDPI journal article supplement (doi:10.3390/ijms24119524), 2023-05-30
Supplement: s1 [file s1]

# Supplementary Material

## **Structural and biological features of G-quadruplex aptamers as promising inhibitors of the STAT3 signaling pathway.**

Veronica Esposito, Daniela Benigno, Ivana Bello, Elisabetta Panza, Mariarosaria Bucci, Antonella Virgilio\* and Aldo Galeone

Department of Pharmacy, University of Naples Federico II, Via D. Montesano 49, I-80131 Naples, Italy

\* Corresponding Author: (AV), e-mail: [antonella.virgilio@unina.it](mailto:antonella.virgilio@unina.it); tel.: +39081678536

### **Table of contents**

CD melting profiles.

PAGE.

CD spectra in 10% Fetal Bovine Serum (FBS).

MTT assay in DU145 cells.

Tables of undegraded species percentages at 72h.

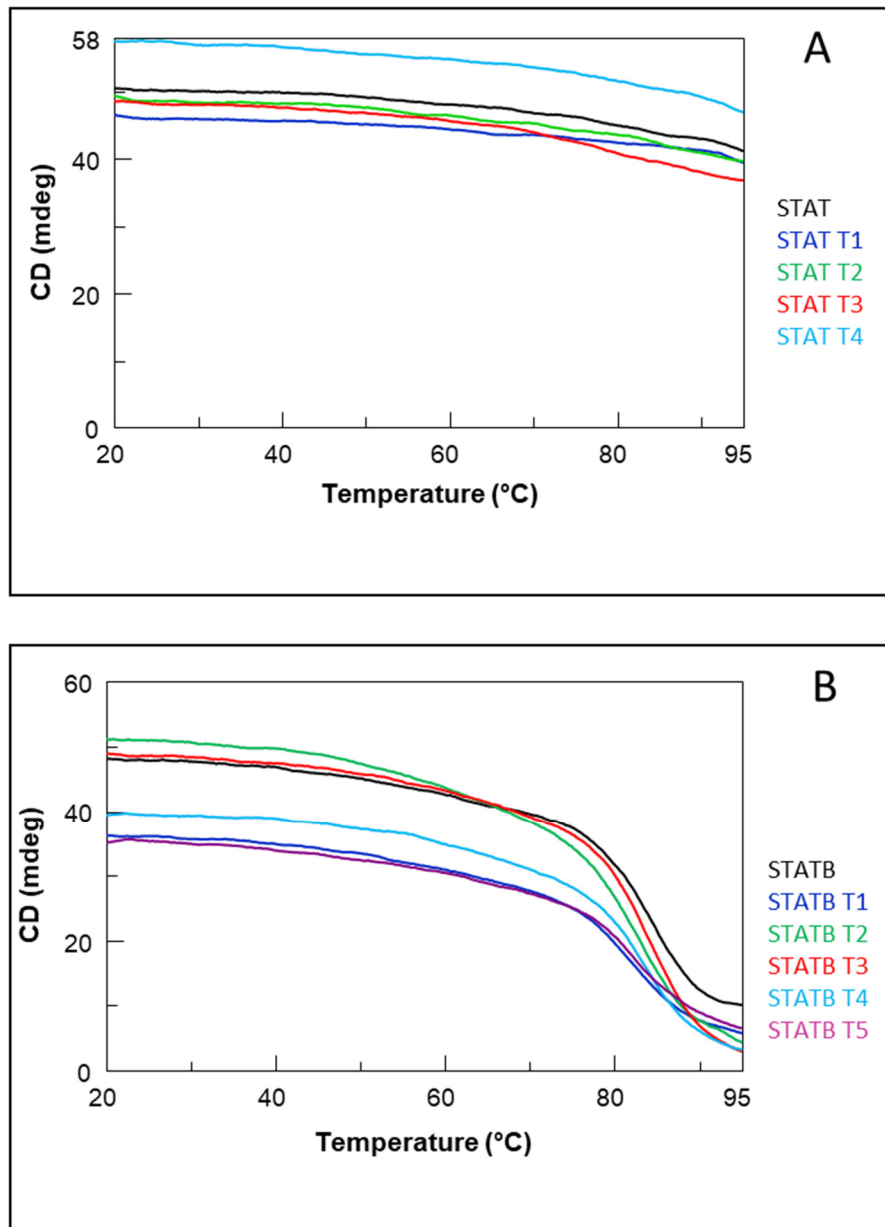

**Figure S1.** CD melting profiles of **STAT** (panel A) and **STATB** (panel B) series registered as a function of temperature for all modified quadruplexes at their maximum Cotton effect wavelengths. CD data were recorded in a 0.1 cm pathlength cuvette with a scan rate of 30°C/h at 50  $\mu$ M ODN strand concentration in potassium phosphate buffer (10 mM  $\text{KH}_2\text{PO}_4/\text{K}_2\text{HPO}_4$ , 70 mM KCl, pH 7.0).

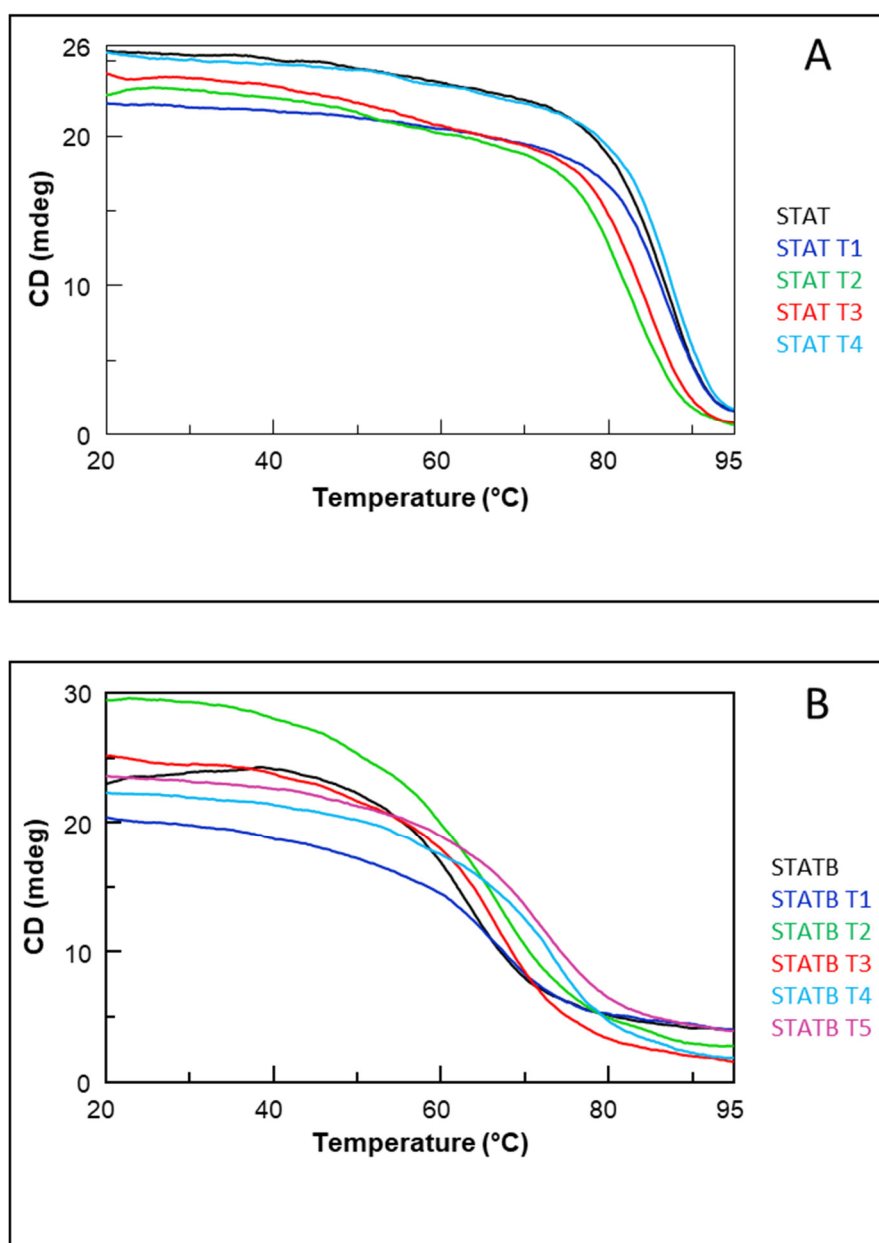

**Figure S2.** CD melting profiles of **STAT** (panel A) and **STATB** (panel B) series registered as a function of temperature for all modified quadruplexes at their maximum Cotton effect wavelengths. CD data were recorded in a 0.1 cm pathlength cuvette with a scan rate of 30°C/h at 50  $\mu$ M ODN strand concentration in potassium phosphate buffer (1 mM  $\text{KH}_2\text{PO}_4/\text{K}_2\text{HPO}_4$ , 5 mM KCl, pH 7.0).

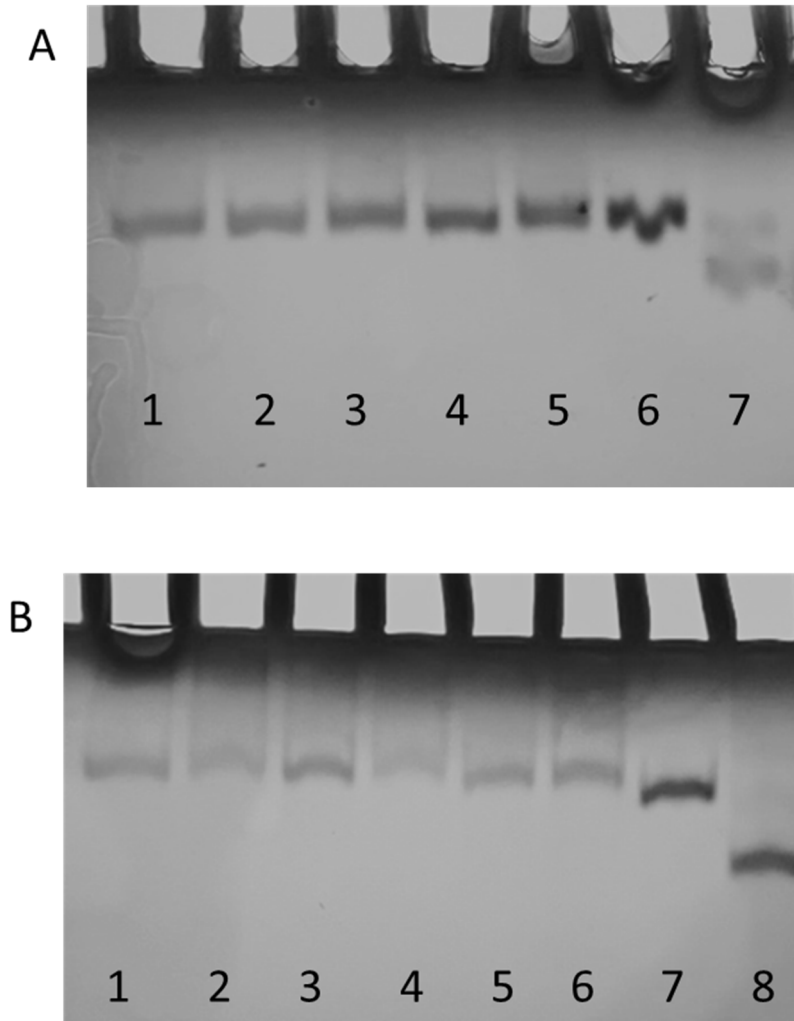

**Figure S3.** PAGE analysis of **STAT** and its investigated analogues (panel A). Lane 1: **STAT**; lane 2: STAT T1; lane 3: STAT T2; lane 4: STAT T3; lane 5: STAT T4; lane 6: INT; lane 7: TT-INT. PAGE analysis of **STATB** and its investigated analogues (panel B). Lane 1: **STATB**; lane 2: STATB T1; lane 3: STATB T2; lane 4: STATB T3; lane 5: STATB T4; lane 6: STATB T5; lane 7: INTB; lane 8: TT-INTB. INT, TT-INT, INTB and TT-INTB have been used as references. See Materials and Methods for experimental details.

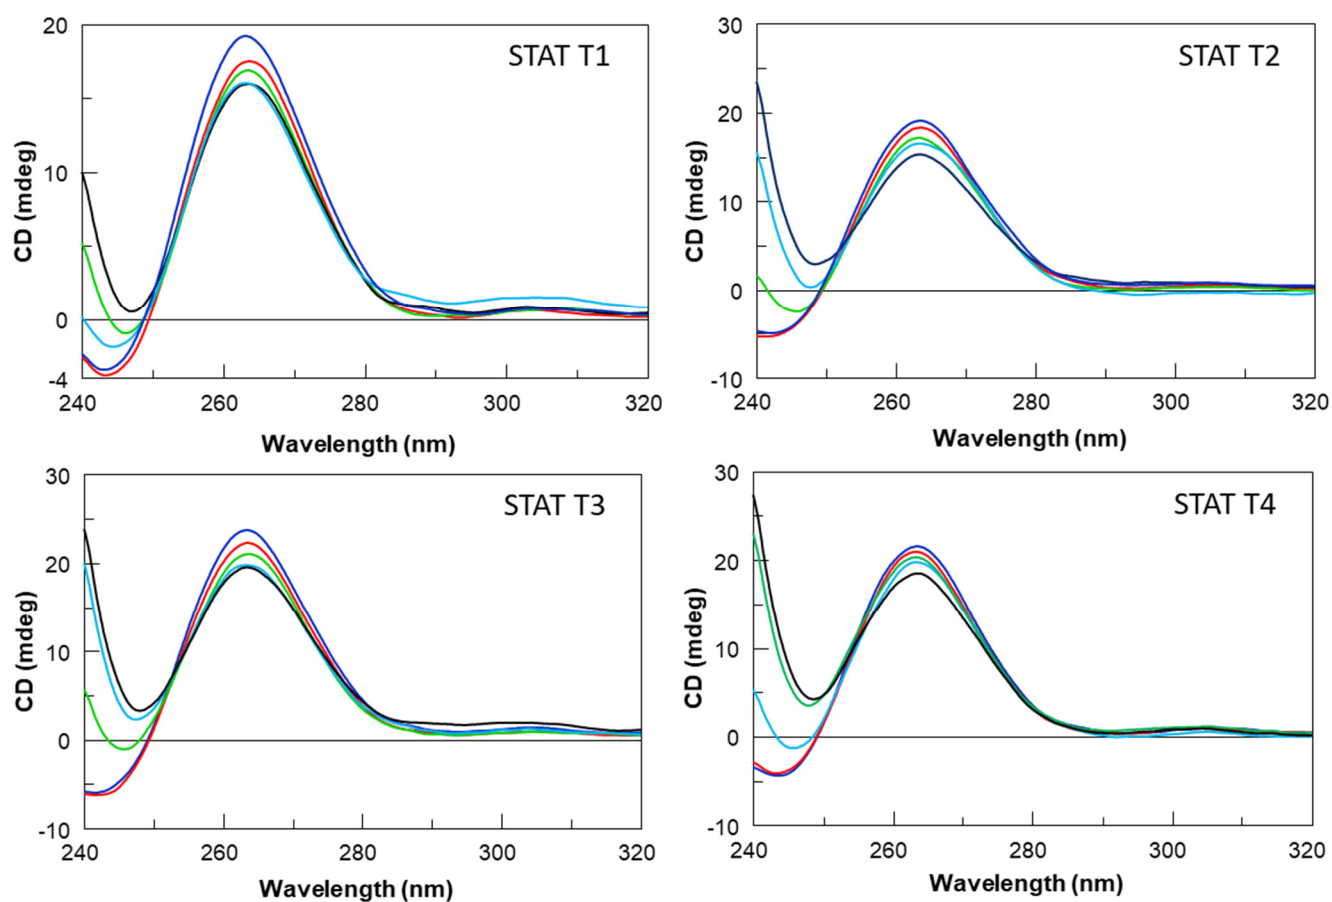

**Figure S4.** CD spectra at 37°C of **STAT** analogues in 10% Fetal Bovine Serum (FBS) diluted with Dulbecco's Modified Eagle's Medium (DMEM), registered at different time: 0 h (blue), 6 h (red), 24 h (green), 48 h (light blue), 72 h (black). See the main text and the Materials and Methods section for details.

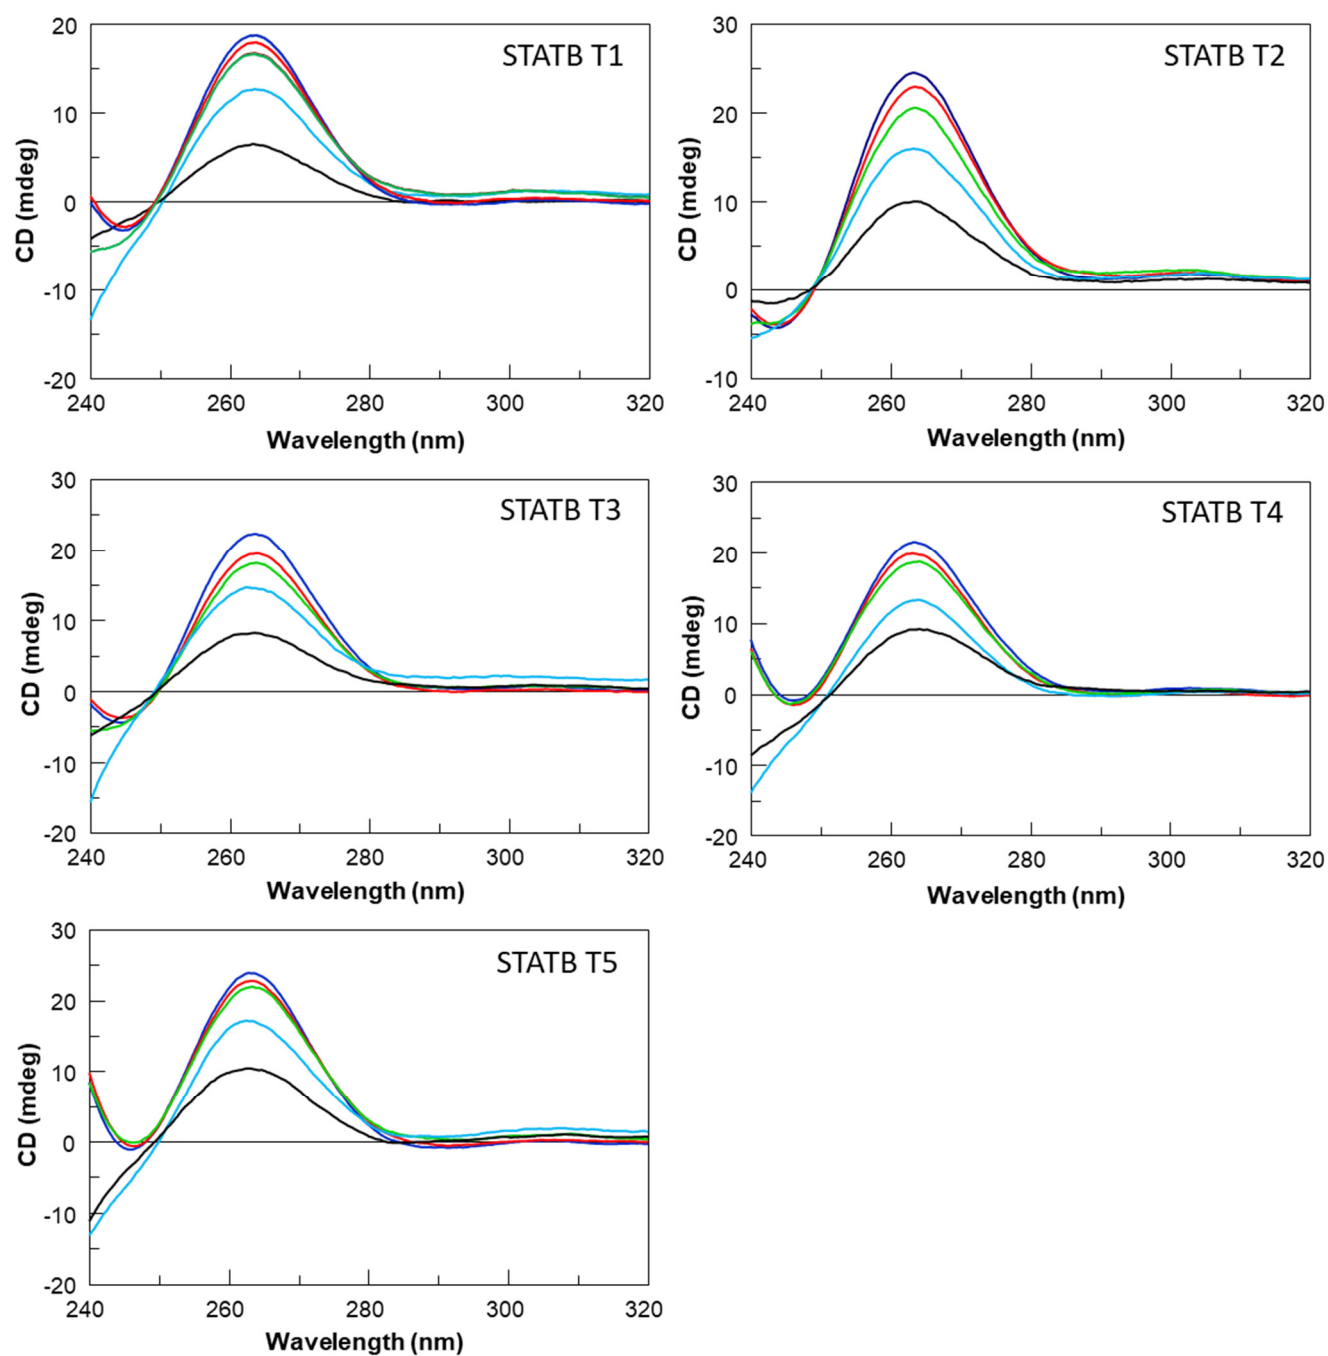

**Figure S5.** CD spectra at 37°C of **STATB** analogues in 10% Fetal Bovine Serum (FBS) diluted with Dulbecco's Modified Eagle's Medium (DMEM), registered at different time: 0 h (blue), 6 h (red), 24 h (green), 48 h (light blue), 72 h (black). See the main text and the Materials and Methods section for details.

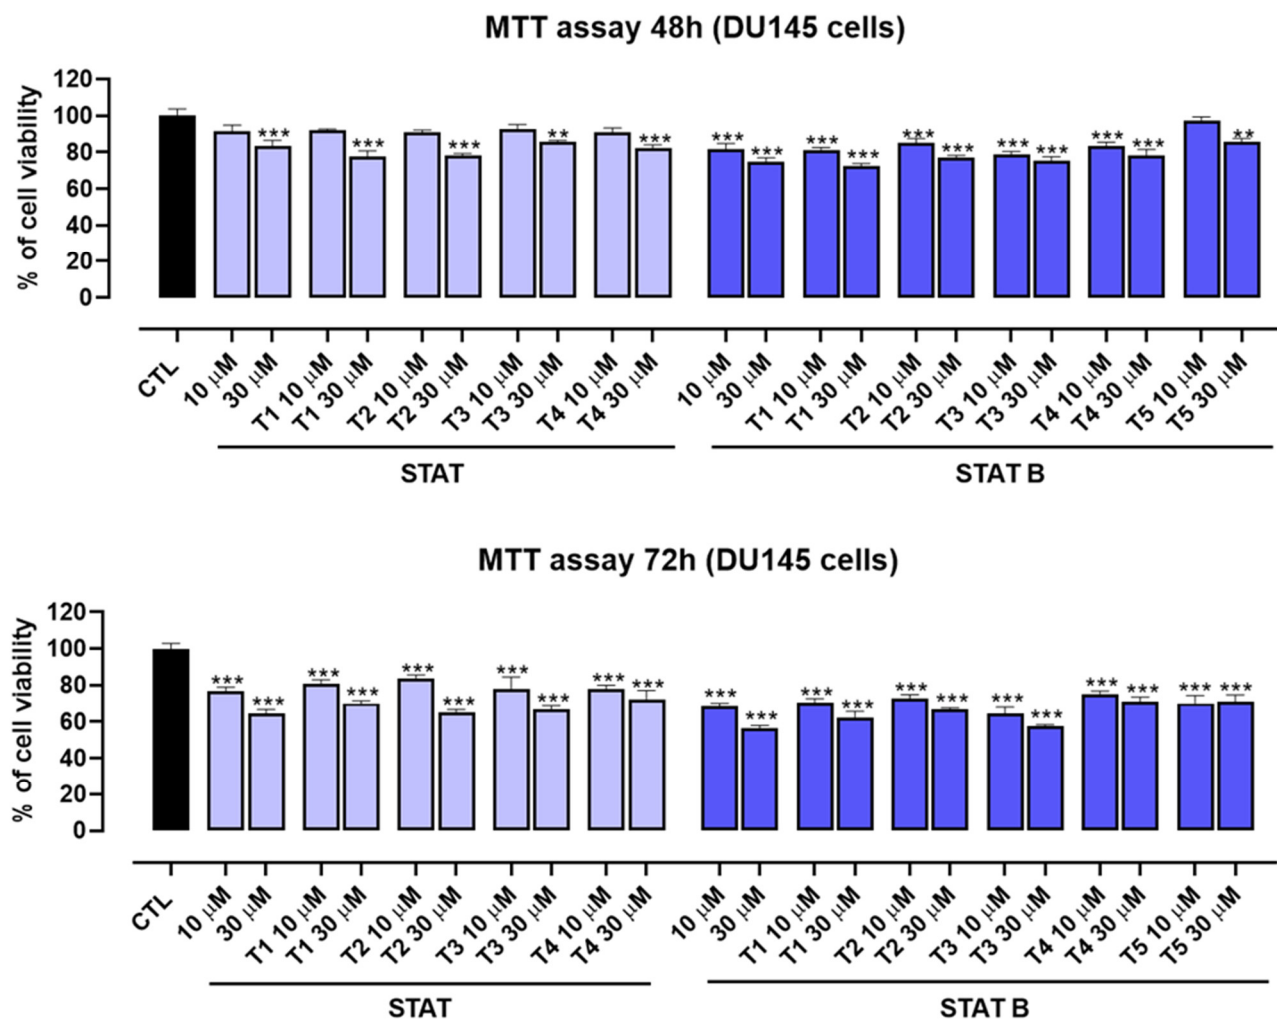

**Figure S6.** Effects of **STAT** and **STATB** series on DU145 cell proliferation. Cell proliferation was measured using the MTT assay and evaluated at 48 and 72 h. Each experiment ( $n = 3$ ) was run in quadruplicate. \*\* $P < 0.01$ ; \*\*\* $P < 0.001$  vs. CTL.

| Sample  | Undegraded specie at 72h (%) |
|---------|------------------------------|
| STAT    | 84                           |
| STAT T1 | 83                           |
| STAT T2 | 80                           |
| STAT T3 | 82                           |
| STAT T4 | 85                           |

**Table S1.** Percentages of undegraded folded species (G-quadruplexes) persistent at 37°C in each sample solution (10% FBS in DMEM) at 72h (**STAT** series).

| Sample   | Undegraded specie at 72h (%) |
|----------|------------------------------|
| STATB    | 28                           |
| STATB T1 | 35                           |
| STATB T2 | 41                           |
| STATB T3 | 37                           |
| STATB T4 | 42                           |
| STATB T5 | 44                           |

**Table S2.** Percentages of undegraded folded species (G-quadruplexes) persistent at 37°C in each sample solution (10% FBS in DMEM) at 72h (**STATB** series).
